# Supplementary material for: Activated ALK Cooperates with N-Myc via Wnt/β-Catenin Signaling to Induce Neuroendocrine Prostate Cancer
Source: Oxford University Press journal article supplement (doi:10.1158/0008-5472.can-20-3351), 2021-02-26
Supplement: 00085472can203351-sup-253135_2_supp_6933537_qcsr3c.xlsx [file 00085472can203351-sup-253135_2_supp_6933537_qcsr3c.xlsx]

## Sheet: Table S1
	Supplementary Table S1. Analysis of prostate cancer datasets at cBioportal database for percent genomic alterations and co-occurrence trend in ALK MYCN and AURKA genes. Database was queried for gain, amplification, mutations and two fold increase in mRNA expression. Alteration percentage of indicidual gene alterations, multiple alterations and total alteration percentage are shown. Percentage of …
	S.No	Dataset	PubMed ID	No. of cases	Gene	Percent Genomic Alterations						Co-occurrence p-Value			Co-occurrence Log2 odds ratio
						MUT	AMP	GAIN	mRNA High	Multiple alteration	Total	ALK- MYCN	MYCN-AURKA	ALK-AURKA	ALK-MYCN	MYCN-AURKA	ALK- AURKA
	A	Metastatic PRAD: SU2C/PCF Dream Team 2019	31061129	444	ALK	1.13	2.7	14.64	1.35	0	19.82	<0.001	0.145	0.542	>3	0.653	0.029
					MYCN	0.23	1.8	15.77	2.03	0.23	20.06
					AURKA	0.45	4.05	28.15	1.35	1.13	35.13
	B	PRAD: MSKCC/DFCI, Nature Genetics 2018	29610475	1013	ALK	0.59	0.79	7.8	NA	0.1	9.28	<0.001	<0.001	<0.001	>3	2.386	2.641
					MYCN	0.2	0.69	0.48	NA	0	1.37
					AURKA	0.2	1.18	15.7	NA	0.1	17.18
	C	PRAD: TCGA Pan Cancer Atlas	29625048	494	ALK	0.4	0.4	3.28	2.87	0	6.95	<0.001	<0.001	0.001	>3	2.303	1.95
					MYCN	0.2	0.2	3.07	6.15	0.2	9.82
					AURKA	0	0.61	4.92	4.51	2.46	12.5
	D	NEPC : Multi-Institute, Nat Med 2016 (NEPC cases)	26855148	15	ALK	0	20	13.33	0	6.67	40	<0.001	<0.001	<0.001	>3	>3	>3
					MYCN	0	26.67	6.67	13.33	6.67	53.34
					AURKA	0	40	0	20	0	60
	D	NEPC : Multi-Institute, Nat Med 2016 (CRPC cases)	26855148	31	ALK	0	6.45	32.26	0	0	38.71
					MYCN	0	6.45	25.81	0	0	32.26
					AURKA	0	25.81	22.58	0	3.23	51.62
	E	PRAD: Fred Hutchinson CRC, Nat Med 2016	26928463	133	ALK	0	1.5	15.04	6.02	0	22.56	<0.001	0.072	0.566	2.553	1.023	-0.042
					MYCN	0	0	18.05	3.76	0.75	22.56
					AURKA	0	0.75	31.58	1.5	0	33.83
	F	PRAD: Broad/Cornell, Cell 2013	23622249	57	ALK	0	0	3.51	NA	0	3.51	0.002	0.895	0.929	>3	<-3	<-3
					MYCN	1.75	0	3.51	NA	0	5.26
					AURKA	0	0	3.51	NA	0	3.51
	G	PRAD: Broad/Cornell, Nat Genet 2012	22610119	20	ALK	0	0	0	5	0	5	0.15	0.15	0.95	>3	>3	<-3
					MYCN	5	0	0	10	0	15
					AURKA	0	0	0	5	0	5
	H	Metastatic PRAD: MCTP, Nature 2012	22722839	61	ALK	1.64	0	1.64	NA	0	3.28	0.06	0.158	0.384	2.787	>3	1.97
					MYCN	0	1.64	6.56	NA	0	8.2
					AURKA	0	1.64	19.67	NA	0	21.31
	I	PRAD: MSKCC, Cancer Cell 2010	20579941	126	ALK	0	0	0	7.14	0	7.14	NA	NA	NA	NA	NA	NA
					MYCN	0	0.79	0.79	5.56	0	7.14
					AURKA	0	0	1.59	34.13	5.56	41.28
