# Supplementary material for: Activated ALK Cooperates with N-Myc via Wnt/β-Catenin Signaling to Induce Neuroendocrine Prostate Cancer
Source: Oxford University Press journal article supplement (doi:10.1158/0008-5472.can-20-3351), 2021-02-26
Supplement: 00085472can203351-sup-253135_2_supp_6933540_qcsr3c.xlsx [file 00085472can203351-sup-253135_2_supp_6933540_qcsr3c.xlsx]

## Sheet: Table S5
Supplementary Table S5. Analysis of ALK and potential ALK-ligand mRNA expression in metastatic prostate cancer dataset. ALK and potential ALK-ligand (PTN, MDK, ALKAL1, ALKAL2) mRNA expression in metastatic prostate cancer dataset (SU2C/PCF Dream Team, 2019, n=208) in TCGA was examined. mRNA expression z-scores relative to diploid samples were downloaded from cBioPortal for the five genes of inter…
STUDY_ID	SAMPLE_ID	ALK	PTN	MDK	ALKAL1	ALKAL2	Ligand with z-score > 0
prad_su2c_2019	SC_9001-Tumor_Liver1	10.2023	-0.2913	-0.6603	0.1309	15.9611	2
prad_su2c_2019	MO_1446_T	3.7786	-0.2633	-0.7595	3.8737	2.7053	2
prad_su2c_2019	TP_2079_Tumor	3.2636	-0.1569	-0.7973	13.4996	5.6113	2
prad_su2c_2019	SC_9203_T	2.9695	-0.2752	0.8066	-0.1465	0.0292	2
prad_su2c_2019	SC_9031-TM	2.8751	-0.1123	-0.2549	-0.0811	0.7865	1
prad_su2c_2019	SC_9096-Tumor	2.2679	-0.2192	-0.1839	11.9851	3.6206	2
prad_su2c_2019	MO_1232-Tumor	1.725	-0.3461	-0.4807	-0.3826	0.3772	1
prad_su2c_2019	SC_9066-Tumor	1.6476	-0.1751	0.7533	2.2971	1.2568	3
prad_su2c_2019	MO_1221-Tumor	0.9377	-0.3399	-0.9933	1.8776	3.2218	2
prad_su2c_2019	SC_9005-Tumor	0.9311	-0.35	-0.8032	-0.3826	-0.3009	0
prad_su2c_2019	SC_9082-TM	0.7066	-0.2408	-0.8843	2.5819	1.0997	2
prad_su2c_2019	SC_9126_Tumor	0.6455	-0.3685	0.9941	0.0568	-0.4008	2
prad_su2c_2019	MO_1482_T	0.4802	-0.3911	0.2189	6.2816	0.0043	3
prad_su2c_2019	SC_9027_T	0.396	-0.3307	-0.7082	1.1005	0.3012	2
prad_su2c_2019	SC_9047-Tumor	0.3743	-0.3491	-1.0046	0.742	0.3489	2
prad_su2c_2019	SC_9193_T	0.2772	-0.3458	-0.5099	1.4208	1.2736	2
prad_su2c_2019	TP_2060-TM	0.1885	-0.333	1.5195	0.6905	3.1731	3
prad_su2c_2019	SC_9144_Tumor	0.1577	-0.3374	-0.2753	0.5378	0.2173	2
prad_su2c_2019	SC_9182_T	0.051	1.001	-0.0744	-0.3826	1.4739	2
prad_su2c_2019	SC_9200_T	0.0475	-0.3837	-0.6608	-0.3826	-0.0428	0
prad_su2c_2019	SC_9152_Tumor	-0.0089	-0.3792	-0.3586	0.2056	1.0518	2
prad_su2c_2019	SC_9184_T	-0.0142	-0.3448	-0.5676	-0.204	0.2209	1
prad_su2c_2019	SC_9017-Tumor	-0.0444	-0.0538	0.4191	-0.2246	-0.4889	1
prad_su2c_2019	SC_9061-Tumor	-0.0473	-0.2754	1.0175	-0.0758	-0.1303	1
prad_su2c_2019	SC_9071-TM	-0.0525	-0.2478	-0.7785	-0.3826	-0.1158	0
prad_su2c_2019	TP_2061-TM	-0.0644	3.1605	1.1279	0.3711	0.3018	4
prad_su2c_2019	SC_9197_T	-0.0826	-0.3652	0.5799	-0.2869	0.1055	2
prad_su2c_2019	MO_1215-Tumor	-0.0844	-0.3817	1.6931	2.1209	0.0751	3
prad_su2c_2019	MO_1074-Tumor	-0.0876	0.3201	-0.3693	0.3624	-0.6386	2
prad_su2c_2019	SC_9023-Tumor	-0.0886	-0.2207	1.9822	-0.3826	0.0161	2
prad_su2c_2019	SC_9049-Tumor	-0.0977	0.7596	-0.5524	0.0855	-0.0302	2
prad_su2c_2019	SC_9170_Tumor	-0.1073	-0.3085	-0.8726	-0.2617	-0.1549	0
prad_su2c_2019	MO_1015-Tumor	-0.1179	-0.3323	-0.8604	6.4769	1.922	2
prad_su2c_2019	SC_9003-Tumor	-0.1283	-0.3185	-0.5392	-0.1696	0.4804	1
prad_su2c_2019	SC_9141_Tumor	-0.1354	-0.3766	-0.8174	-0.3212	-0.1348	0
prad_su2c_2019	MO_1263-Tumor	-0.1371	0.3028	-0.82	-0.3826	-0.9703	1
prad_su2c_2019	SC_9120_T	-0.1372	-0.0232	-0.389	-0.3826	0.4922	1
prad_su2c_2019	SC_9069_T	-0.1399	-0.3452	-0.6256	-0.3826	0.0085	1
prad_su2c_2019	MO_1179-Tumor	-0.1404	-0.0226	-0.342	-0.3826	-0.1754	0
prad_su2c_2019	MO_1460_Tumor	-0.1422	-0.3701	-0.3462	-0.1796	0.0337	1
prad_su2c_2019	SC_9165_Tumor	-0.1461	-0.3311	-0.5319	-0.0786	1.2075	1
prad_su2c_2019	SC_9151_Tumor	-0.1476	-0.1077	-0.665	-0.3173	0.1812	1
prad_su2c_2019	TP_2001-Tumor	-0.1507	-0.252	-0.4858	-0.3294	0.8186	1
prad_su2c_2019	MO_1541_T	-0.152	-0.2753	2.2029	-0.3826	-0.9146	1
prad_su2c_2019	SC_9026-Tumor	-0.1536	-0.3072	1.0547	-0.3826	-0.5145	1
prad_su2c_2019	MO_1184-Tumor	-0.1562	-0.335	0.2874	-0.2946	0.5689	2
prad_su2c_2019	SC_9091-TM	-0.1585	-0.3656	5.4311	-0.1827	0.0921	2
prad_su2c_2019	SC_9005_T	-0.1586	-0.3809	-0.7568	-0.2485	-0.3158	0
prad_su2c_2019	SC_9039-Tumor	-0.163	6.831	-0.4848	0.1209	1.337	3
prad_su2c_2019	SC_9172_Tumor	-0.163	-0.3474	-0.5897	-0.3826	0.1543	1
prad_su2c_2019	TP_2009-Tumor	-0.167	0.0502	0.513	-0.3826	0.1211	3
prad_su2c_2019	SC_9027-Tumor	-0.1682	-0.2872	-0.7521	-0.3178	-0.5739	0
prad_su2c_2019	SC_9156_Tumor	-0.1688	-0.3122	-0.8187	-0.278	2.7976	1
prad_su2c_2019	MO_1054-Tumor	-0.1718	-0.2682	-0.7875	0.0914	0.463	2
prad_su2c_2019	MO_1469_T	-0.1736	-0.2551	0.1723	1.0266	1.0021	3
prad_su2c_2019	SC_9150_Tumor	-0.175	-0.3836	-0.877	-0.1716	1.9975	1
prad_su2c_2019	SC_9145_Tumor	-0.1779	0.3966	1.5041	-0.1241	-0.1474	2
prad_su2c_2019	MO_1095-Tumor	-0.1788	-0.3738	-0.9968	-0.3826	0.8857	1
prad_su2c_2019	SC_9065-Tumor	-0.1791	0.1339	-0.7202	-0.3283	-0.1819	1
prad_su2c_2019	SC_9187_T	-0.1817	-0.3926	-0.5074	1.2621	-0.2788	1
prad_su2c_2019	SC_9142_Tumor	-0.1863	-0.3604	-0.8307	-0.3826	-0.2204	0
prad_su2c_2019	MO_1096-Tumor	-0.1881	0.174	0.5194	-0.3826	-0.099	2
prad_su2c_2019	MO_1130-Tumor	-0.1888	-0.3594	0.0994	-0.3826	0.2277	2
prad_su2c_2019	SC_9012-Tumor	-0.1892	-0.3961	0.5176	2.3957	-0.9412	2
prad_su2c_2019	SC_9076-TM	-0.1919	-0.3591	1.7818	-0.3302	0.1233	2
prad_su2c_2019	SC_9177_T	-0.1927	2.3004	-0.7067	-0.3826	3.4343	2
prad_su2c_2019	SC_9056-Tumor	-0.1931	-0.3571	-0.1766	-0.3071	-0.5293	0
prad_su2c_2019	SC_9204_T	-0.1944	-0.3371	0.2496	0.2535	0.1942	3
prad_su2c_2019	TP_2020-Tumor	-0.1952	0.0878	4.9762	-0.3826	-0.4728	2
prad_su2c_2019	SC_9121_Tumor	-0.1956	-0.3544	0.4919	-0.0062	-0.0652	1
prad_su2c_2019	SC_9138_Tumor	-0.1965	-0.3108	-0.2317	-0.3826	1.3388	1
prad_su2c_2019	SC_9083-TM	-0.1972	-0.2973	-0.0125	-0.3172	-0.6843	0
prad_su2c_2019	TP_2054-TM	-0.1985	-0.3455	0.2778	-0.3359	0.8295	2
prad_su2c_2019	MO_1071-Tumor	-0.204	0.5259	-0.726	1.4427	0.4785	3
prad_su2c_2019	SC_9060-Tumor	-0.2046	2.1176	-0.2814	-0.0886	1.0426	2
prad_su2c_2019	SC_9022-Tumor	-0.2069	-0.3669	0.6398	-0.0095	-0.912	1
prad_su2c_2019	SC_9129_Tumor	-0.2076	3.5784	-0.7868	-0.3826	0.1749	2
prad_su2c_2019	SC_9068-Tumor	-0.2078	-0.3801	0.5702	-0.3294	-0.3038	1
prad_su2c_2019	SC_9139_Tumor	-0.2117	-0.3558	-0.3245	-0.0919	1.2343	1
prad_su2c_2019	MO_1490_T	-0.2122	-0.3357	1.3726	-0.3265	-0.9544	1
prad_su2c_2019	SC_9136_Tumor	-0.2122	-0.1705	-0.6545	-0.3826	-0.4306	0
prad_su2c_2019	SC_9048-Tumor	-0.2128	-0.2479	-0.0528	-0.3826	-1.1074	0
prad_su2c_2019	SC_9059-Tumor	-0.2128	-0.3819	-0.9013	-0.3826	-0.019	0
prad_su2c_2019	SC_9090_T	-0.2134	-0.3411	0.0176	-0.3061	-0.4721	1
prad_su2c_2019	SC_9055-Tumor	-0.2139	-0.0004	-0.4307	-0.3826	-0.0371	0
prad_su2c_2019	SC_9019-Tumor	-0.2146	-0.2457	-0.0175	-0.3826	-0.8409	0
prad_su2c_2019	SC_9080-TM	-0.215	-0.3544	0.645	-0.3826	0.4248	2
prad_su2c_2019	SC_9162_Tumor	-0.2164	-0.3584	0.2099	2.7378	1.1841	3
prad_su2c_2019	MO_1420_Tumor	-0.2167	-0.2811	0.3439	-0.3826	2.39	2
prad_su2c_2019	SC_9105_Tumor	-0.2173	-0.2025	0.1357	0.0348	-0.3247	2
prad_su2c_2019	MO_1410-Tumor	-0.2178	-0.3641	-0.912	0.5114	-0.451	1
prad_su2c_2019	SC_9171_Tumor	-0.2179	-0.2945	-0.6186	-0.3826	-0.7234	0
prad_su2c_2019	SC_9024-Tumor	-0.2182	-0.1566	-0.723	0.0223	1.0953	2
prad_su2c_2019	SC_9034-Tumor	-0.2195	0.3676	-0.3179	-0.3826	0.5279	2
prad_su2c_2019	SC_9094-Tumor	-0.2202	0.029	0.562	-0.3826	-0.9626	2
prad_su2c_2019	MO_1249-Tumor	-0.221	-0.3658	-0.9892	-0.3826	-0.7569	0
prad_su2c_2019	SC_9028-Tumor	-0.222	-0.2148	-0.0665	-0.3294	-0.9445	0
prad_su2c_2019	SC_9194_T	-0.2223	-0.2705	-0.0381	-0.3826	-0.3695	0
prad_su2c_2019	SC_9007-Tumor	-0.2236	-0.3605	-0.7611	-0.3826	1.1381	1
prad_su2c_2019	SC_9140_Tumor	-0.2257	-0.3417	0.9289	0.1663	0.0396	3
prad_su2c_2019	TP_2069_Tumor	-0.226	-0.3712	-0.7798	-0.2528	-0.2202	0
prad_su2c_2019	MO_1337-TM	-0.2273	-0.3435	0.541	-0.2498	0.3674	2
prad_su2c_2019	SC_9104-Tumor	-0.2273	-0.3751	0.7113	-0.1889	-0.2262	1
prad_su2c_2019	SC_9107-Tumor	-0.2275	-0.387	-0.8461	-0.0038	0.2043	1
prad_su2c_2019	SC_9146_T	-0.2281	-0.2595	-0.7173	0.6629	-0.6692	1
prad_su2c_2019	SC_9195_T	-0.2299	-0.1437	0.0264	-0.3041	-0.731	1
prad_su2c_2019	SC_9043-Tumor	-0.231	3.9025	0.2986	-0.3826	-1.1523	2
prad_su2c_2019	MO_1244-Tumor	-0.2323	-0.3918	-0.3937	-0.1975	-0.0923	0
prad_su2c_2019	MO_1514_T	-0.2329	-0.3206	0.2483	-0.2744	-0.1872	1
prad_su2c_2019	MO_1499_T	-0.2351	-0.323	0.1099	-0.3826	0.196	2
prad_su2c_2019	SC_9062-Tumor	-0.2362	-0.3719	-0.3598	-0.2112	-0.4638	0
prad_su2c_2019	SC_9163_Tumor	-0.2389	-0.3772	-0.2756	-0.3826	-0.1904	0
prad_su2c_2019	SC_9123_Tumor	-0.2391	-0.3729	-0.733	-0.3826	0.2877	1
prad_su2c_2019	SC_9046-Tumor	-0.2393	-0.357	-0.9447	-0.0481	-0.0332	0
prad_su2c_2019	TP_2077_Tumor	-0.2394	-0.3578	0.0364	-0.1838	0.3236	2
prad_su2c_2019	SC_9196_T	-0.2394	-0.3635	-0.8405	-0.3826	0.1354	1
prad_su2c_2019	SC_9035-Tumor	-0.2398	-0.3803	-0.4551	-0.3106	-0.3093	0
prad_su2c_2019	TP_2081_T	-0.2406	2.7216	-0.6317	-0.3826	0.9791	2
prad_su2c_2019	SC_9158_Tumor	-0.2407	-0.2937	0.0006	-0.3826	-0.7522	1
prad_su2c_2019	SC_9050-Tumor	-0.2415	-0.3586	-0.7695	-0.3826	-0.3356	0
prad_su2c_2019	MO_1084-Tumor	-0.2422	-0.3893	-0.4298	-0.3217	5.1433	1
prad_su2c_2019	MO_1219-Tumor	-0.2424	-0.2406	-0.3635	-0.3826	0.0693	1
prad_su2c_2019	MO_1114-Tumor	-0.2428	-0.3327	-0.7229	-0.1199	-0.3647	0
prad_su2c_2019	SC_9189_T	-0.2445	-0.3467	-0.7208	-0.3826	-0.5709	0
prad_su2c_2019	MO_1124-Tumor	-0.2455	-0.3537	-0.7449	0.5065	-0.5901	1
prad_su2c_2019	MO_1040-Tumor	-0.2461	0.9715	-0.4723	-0.3826	-0.2932	1
prad_su2c_2019	MO_1443_T	-0.2475	0.2468	0.2991	-0.3826	-0.4266	2
prad_su2c_2019	MO_1421_Tumor	-0.2485	0.045	-0.2281	-0.0991	-0.8128	1
prad_su2c_2019	SC_9192_T	-0.2489	-0.3513	-0.8597	-0.3826	-0.382	0
prad_su2c_2019	MO_1262-Tumor	-0.2497	-0.3379	-0.8062	-0.3141	-0.527	0
prad_su2c_2019	SC_9103-Tumor	-0.2505	-0.3644	-0.5768	-0.2278	-0.7408	0
prad_su2c_2019	SC_9020-Tumor	-0.2509	0.3393	0.489	-0.3826	-1.053	2
prad_su2c_2019	MO_1336-TM	-0.251	0.078	-0.7173	-0.2465	-1.0246	1
prad_su2c_2019	SC_9179_T	-0.2511	-0.154	-0.8638	-0.3826	-0.3788	0
prad_su2c_2019	MO_1511_T	-0.2519	-0.056	2.0432	-0.3173	0.0234	2
prad_su2c_2019	SC_9058-Tumor	-0.2526	-0.3784	-0.356	-0.3826	-0.1757	0
prad_su2c_2019	MO_1202-Tumor	-0.2528	-0.3669	-0.4265	0.5983	-0.6384	1
prad_su2c_2019	SC_9176_T	-0.2532	-0.376	-0.0392	-0.2559	-0.1342	0
prad_su2c_2019	SC_9035_T	-0.2534	-0.3775	-0.7294	-0.3181	0.0065	1
prad_su2c_2019	MO_1517_T	-0.2543	-0.2595	0.3634	-0.3826	-0.4043	1
prad_su2c_2019	SC_9036-Tumor	-0.2551	-0.2894	-0.162	-0.3826	-0.4019	0
prad_su2c_2019	MO_1094-Tumor	-0.2559	-0.3715	0.7314	-0.3826	0.5487	2
prad_su2c_2019	MO_1008-Tumor_Dura	-0.2561	7.1459	-0.5724	-0.2919	-1.3937	1
prad_su2c_2019	MO_1162-Tumor	-0.2561	-0.3135	-0.9547	-0.3826	0.1561	1
prad_su2c_2019	SC_9021-Tumor	-0.2567	-0.322	0.879	-0.3826	0.2701	2
prad_su2c_2019	MO_1543_T	-0.2578	0.4761	0.6893	0.001	0.2245	4
prad_su2c_2019	SC_9190_T	-0.259	-0.3614	0.3831	0.5145	-0.804	2
prad_su2c_2019	SC_9065-TM-Tumor2	-0.2592	-0.2933	-0.7269	-0.3826	-0.456	0
prad_su2c_2019	SC_9037-Tumor	-0.2593	-0.2754	-0.7956	0.3004	0.4813	2
prad_su2c_2019	SC_9118_Tumor	-0.2597	-0.261	2.0004	-0.3826	-1.1045	1
prad_su2c_2019	TP_2078_Tumor	-0.26	-0.3479	0.7808	-0.3143	-0.8586	1
prad_su2c_2019	SC_9016-Tumor	-0.2606	-0.3332	0.8907	-0.2962	-0.5603	1
prad_su2c_2019	MO_1339-TM	-0.2607	3.8556	1.0155	0.1	0.0189	4
prad_su2c_2019	MO_1492_T	-0.2619	-0.3845	0.813	-0.3283	-0.576	1
prad_su2c_2019	MO_1241-Tumor	-0.2622	-0.3865	-0.3235	-0.1431	-0.5278	0
prad_su2c_2019	SC_9033_T	-0.2627	-0.285	-0.8524	-0.3114	-0.193	0
prad_su2c_2019	SC_9056_T	-0.2628	-0.3658	2.2918	-0.3177	-0.65	1
prad_su2c_2019	SC_9201_T	-0.2629	-0.3582	-0.1336	-0.3826	-0.216	0
prad_su2c_2019	SC_9109-Tumor	-0.264	-0.2904	-0.0868	-0.1891	-0.4606	0
prad_su2c_2019	SC_9148_Tumor	-0.2666	-0.2502	-0.1175	-0.3826	-0.1262	0
prad_su2c_2019	SC_9081-TM	-0.2677	-0.3806	0.9265	-0.3826	-0.842	1
prad_su2c_2019	SC_9092-TM	-0.2681	-0.2818	-0.49	-0.259	-1.0212	0
prad_su2c_2019	SC_9124_Tumor	-0.2684	-0.3897	-0.3848	-0.3826	-0.9848	0
prad_su2c_2019	MO_1118-TM	-0.2686	-0.39	-0.7247	-0.2528	-0.5721	0
prad_su2c_2019	SC_9084-TM	-0.2692	-0.3866	0.2204	-0.33	-0.4741	1
prad_su2c_2019	MO_1192-Tumor	-0.2697	-0.3358	-0.0251	-0.0812	-0.8489	0
prad_su2c_2019	MO_1473_Tumor	-0.2698	-0.1328	-0.407	-0.3826	0.2015	1
prad_su2c_2019	SC_9018-Tumor	-0.2714	-0.2964	-0.553	-0.3826	-0.7689	0
prad_su2c_2019	TP_2064-TM	-0.2716	-0.3317	3.9266	-0.2578	0.1485	2
prad_su2c_2019	SC_9057-Tumor	-0.2719	-0.198	-0.0708	-0.3826	-0.7725	0
prad_su2c_2019	SC_9199_T	-0.272	-0.3699	-0.9498	-0.3826	-0.5142	0
prad_su2c_2019	SC_9178_T	-0.2726	0.1099	-0.3051	-0.1721	-0.9708	1
prad_su2c_2019	MO_1316-TM	-0.2735	-0.3464	1.6579	-0.3205	-0.42	1
prad_su2c_2019	SC_9086-TM	-0.2735	-0.1459	0.4908	-0.3048	-0.4095	1
prad_su2c_2019	TP_2034-Tumor-Bone-Block-3B	-0.2737	-0.3273	-0.4712	-0.3826	0.1516	1
prad_su2c_2019	SC_9011-Tumor	-0.2742	-0.3653	-0.8898	-0.3142	-1.105	0
prad_su2c_2019	SC_9153_Tumor	-0.2751	-0.3773	0.6824	0.0638	-0.4523	2
prad_su2c_2019	SC_9137_Tumor	-0.2753	-0.3655	1.1497	-0.3826	-0.7213	1
prad_su2c_2019	SC_9073-TM	-0.2753	-0.3578	-0.699	-0.3826	-0.3657	0
prad_su2c_2019	MO_1447_Tumor	-0.2754	-0.3877	-0.4751	-0.3826	-0.5758	0
prad_su2c_2019	TP_2010-Tumor	-0.2755	-0.2337	-0.5103	-0.3826	-0.1677	0
prad_su2c_2019	SC_9086_T	-0.2756	-0.1379	-0.1809	-0.3826	-0.5835	0
prad_su2c_2019	SC_9173_Tumor	-0.2757	-0.3906	-0.9712	-0.3826	-0.716	0
prad_su2c_2019	SC_9100-Tumor	-0.2782	-0.2786	-0.5936	-0.3826	-0.1727	0
prad_su2c_2019	TP_2032-Tumor	-0.2783	-0.3329	-0.903	-0.3139	-0.9385	0
prad_su2c_2019	SC_9097-TM	-0.2788	-0.3064	0.2028	-0.3826	-0.427	1
prad_su2c_2019	MO_1277-TM	-0.2798	-0.3223	-1.0065	-0.3826	-0.6325	0
prad_su2c_2019	SC_9030-Tumor	-0.2811	11.8824	2.8742	-0.3826	0.0883	3
prad_su2c_2019	SC_9186_T	-0.2811	-0.3263	-0.7161	-0.2956	-0.0828	0
prad_su2c_2019	SC_9016_T	-0.2814	-0.2374	0.5952	-0.3826	-0.4253	1
prad_su2c_2019	SC_9089-TM	-0.2817	-0.3201	-0.4788	-0.3826	-0.7463	0
prad_su2c_2019	MO_1510_T	-0.2819	-0.3719	-0.492	-0.2304	0.0277	1
prad_su2c_2019	MO_1176-Tumor	-0.2822	-0.3654	0.6498	-0.3826	-0.6392	1
prad_su2c_2019	SC_9063-Tumor	-0.2836	-0.379	0.9108	-0.3826	-0.441	1
prad_su2c_2019	SC_9099-Tumor	-0.2838	-0.3075	-0.5606	-0.3162	-0.593	0
prad_su2c_2019	MO_1553_T	-0.2839	-0.2932	2.3779	-0.3826	0.1518	2
prad_su2c_2019	SC_9074_T	-0.2841	3.2967	-0.4116	-0.3826	0.7924	2
prad_su2c_2019	SC_9032-Tumor	-0.2846	-0.3522	1.4274	-0.3826	0.99	2
prad_su2c_2019	SC_9093-TM	-0.2856	-0.3308	0.2055	-0.3826	-0.2087	1
prad_su2c_2019	SC_9072-TM	-0.2864	-0.1753	-0.1076	-0.3826	-1.1014	0
prad_su2c_2019	SC_9132_Tumor	-0.2868	-0.329	-0.5018	-0.3826	-0.5221	0
prad_su2c_2019	SC_9175_T	-0.2875	-0.3898	0.2221	-0.3826	-0.6869	1
prad_su2c_2019	MO_1161-TM	-0.2876	-0.3809	0.2345	-0.2465	-0.0815	1
prad_su2c_2019	MO_1556_T	-0.2884	-0.3872	-0.5965	-0.0128	-0.7252	0
prad_su2c_2019	SC_9054-Tumor	-0.2886	0.5108	-0.697	-0.3826	-0.9564	1
prad_su2c_2019	TP_2096_T	-0.2897	-0.2918	-0.9847	-0.3826	-0.4699	0
prad_su2c_2019	TP_2093_T	-0.2907	1.1885	0.6118	-0.3826	-0.6635	2
prad_su2c_2019	SC_9029-Tumor	-0.2967	-0.3921	-0.7634	-0.3826	-0.7626	0
